# Supplementary material
Source: publisher figshare collection journal article supplement (https://acs.figshare.com/ndownloader/files/18053192)
Supplement: Supplementary file 1 [file 18053192]

# Molecular recognition of rhodopsin kinase GRK1 and recoverin is tuned by switching intra/intermolecular electrostatic interactions

Seher Abbas,<sup>1</sup> Valerio Marino,<sup>2,3</sup> Daniele Dell'Orco,<sup>2</sup> Karl-Wilhelm Koch,<sup>1\*</sup>

<sup>1</sup> Department of Neuroscience, Division of Biochemistry, University of Oldenburg, 26111 Oldenburg, Germany

<sup>2</sup> Department of Neurosciences, Biomedicine and Movement Sciences, Section of Biological Chemistry, University of Verona, 37134 Verona, Italy

<sup>3</sup> Department of Translational Research and New Technologies in Medicine and Surgery, University of Pisa, 56126 Pisa, Italy

## Supplementary Information

**Table S1**

| Name  | ZD-s            | Native-like solutions | $\Delta$ ZD-s | $\Delta\Delta G^0$ (kcal/mol) |
|-------|-----------------|-----------------------|---------------|-------------------------------|
| WT    | $36.0 \pm 0.20$ | 444                   | -             | -                             |
| K192E | $35.6 \pm 0.19$ | 441                   | -0.4          | 0.73                          |
| K192L | $35.5 \pm 0.18$ | 437                   | -0.5          | 0.82                          |

ZD-s is the ZDOCK 2.3 score presented as average  $\pm$  std. err,  $\Delta\Delta G^0$  is calculated with respect to the WT as elucidated in the Methods.

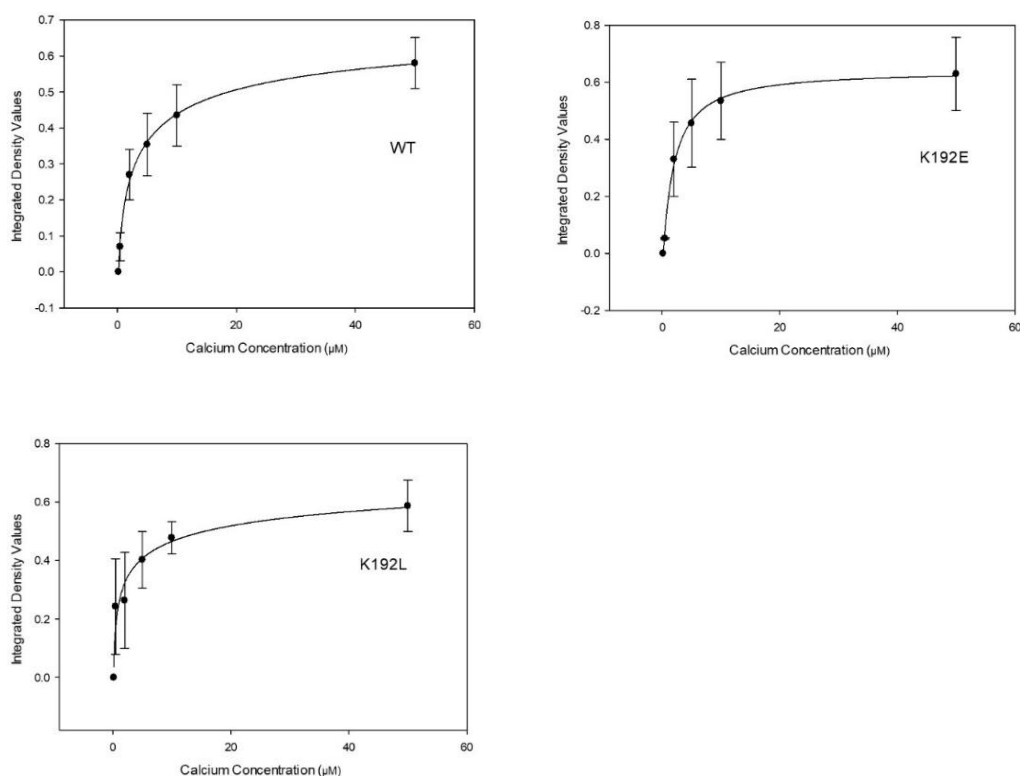

**Figure S1.** Recoverin binding to membranes. All myristoylated and non-myristoylated Rec variants were tested for membrane binding in the presence and absence of Ca<sup>2+</sup> (5 mM EGTA for Ca<sup>2+</sup>-free conditions). Both mutants K192L and K192E showed a binding pattern similar to that of the WT (Table 1).

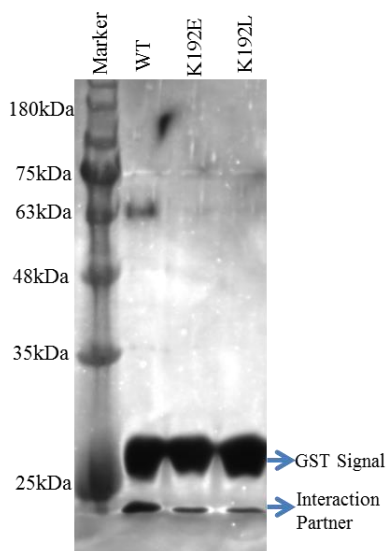

**Figure S2.** Interaction of Rec variants K192E and K192L with GRK1 monitored by pull down assay. Both Rec mutants showed weaker binding to the N-terminus of the kinase than the WT. All Rec variants were tested in the presence of 2 mM CaCl<sub>2</sub>. Eluted proteins were tested in two independent western blots using anti Rec and anti GST antibodies.

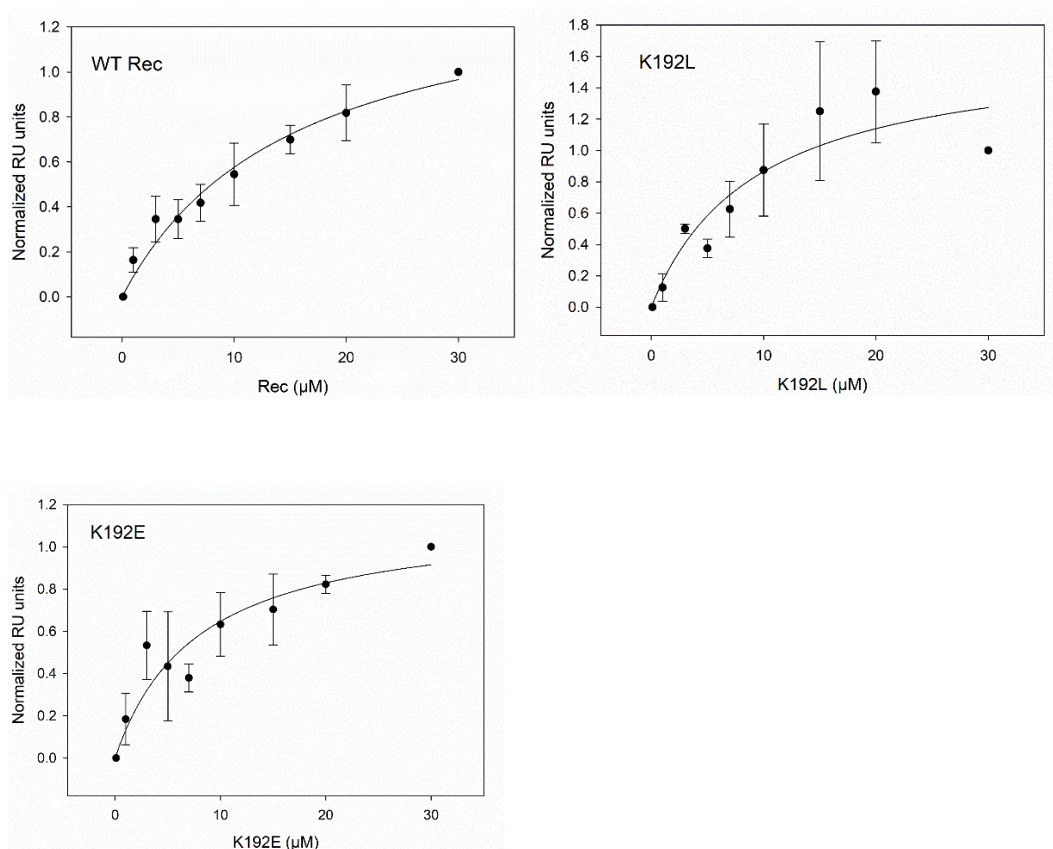

**Figure S3.** Interaction of Rec variants (WT, mutants K192L and K192E) with immobilized GST-GRK1 monitored by surface plasmon resonance spectroscopy. Normalized RU values were calculated as described in the Methods section. Titrations (two in each panel) are representative of a total of  $n = 4$  that were used for the calculation of parameters in Table 1 (main text).
